# Supplementary material for: A Sensory-Driven Trade-Off between Coordinated Motion in Social Prey and a Predator’s Visual Confusion
Source: PubMed Central journal article supplement (PMC4767524; doi:10.1371/journal.pcbi.1004708), 2016-02-25
Supplement: pcbi.1004708.s001.pdf [file pcbi.1004708.s001.pdf]

# Supplementary Information:

## A sensory-driven tradeoff between coordinated motion in social prey and a predator's visual confusion

Lemasson, B.H<sup>1\*</sup>, Tanner, C.J.<sup>2</sup> and Dimperio, E.<sup>3</sup>

1. Environmental Laboratory, U.S. Army Engineer Research & Development Center,  
Santa Barbara, CA, USA<sup>†</sup>

2. Department of Ecology, Université de Lausanne, Switzerland<sup>‡</sup>

3. Corios, L.L.C., Portland, OR, U.S.A.

### 1 Contents

|   |                                                               |   |
|---|---------------------------------------------------------------|---|
| 2 | S1 Model . . . . .                                            | 2 |
| 3 | S1.1 Visual motion perception . . . . .                       | 2 |
| 4 | S1.2 Travel costs . . . . .                                   | 3 |
| 5 | S2 Game . . . . .                                             | 4 |
| 6 | S2.1 Errors, edges, & ecologically relevant effects . . . . . | 4 |

---

\*Author for correspondence: [brilraven@gmail.com](mailto:brilraven@gmail.com)

<sup>†</sup>Current address: ERDC, Newport, OR, U.S.A.

<sup>‡</sup>Current address: School of Biological Sciences, University of Nebraska-Lincoln, NB, U.S.A.

## 7 S1 Model

### 8 S1.1 Visual motion perception

9 Here we review details of how visual perception is included in the model, which is based  
10 on earlier work [11] that we present here to help the reader. The speed at which objects  
11 appear to be moving is largely affected by how far away they are and in what direction  
12 they are moving. In a 2D world we assume that an object at distance  $d_{j,i}$  will either  
13 be moving towards an observer, away from them, or across their line-of-sight. Line-of-  
14 sight in an unconstrained field of view is given by the directional vector  $\mathbf{d}_{j,i}$ , which is  
15 neighbor  $j$ 's position with respect to observer  $i$ . The magnitude of this vector gives the  
16 intervening distance,  $d_{j,i} = |\mathbf{d}_{j,i}|$ , while the normalized component provides the direction,  
17  $\hat{\mathbf{d}}_{j,i} = \mathbf{d}_{j,i}/|\mathbf{d}_{j,i}|$ . The observer thus sees a neighbor as an image on its retina whose motion  
18 has both a radial and translational component with regards to the observer's gaze:

$$\dot{\Omega}_{j,i} = f(\psi_{j,i}, \lambda_{j,i}) \quad (\text{s1})$$

19 We assume that a neighbor's radial motion is given as a looming or receding stimuli:

$$\psi_{j,i} = \frac{-2 \cdot v_{j,i}^{\parallel} \cdot r}{d_{j,i}^2 + r^2}, \quad (\text{s2})$$

20 where  $v_{j,i}^{\parallel}$  is the neighbor's speed along  $\hat{\mathbf{d}}_{j,i}$  and  $r$  is the radius of the particles. Transla-  
21 tional motion is given by:

$$\lambda_{j,i} = v_{j,i}^{\perp} \cdot d_{j,i}^{-1} \quad (\text{s3})$$

22 where  $v_{j,i}^{\perp}$  is the neighbor's speed across  $\hat{\mathbf{d}}_{j,i}$  [11]. During each visual scan we assume that  
23 the overall strength of a neighbor's motion cue is proportional to the magnitude of these  
24 visual components at time step,  $t$ :

$$\omega_{j,i} = \sqrt{\psi_{j,i}^2 + \lambda_{j,i}^2} \cdot \Delta t \quad (\text{s4})$$

25 **S1.2 Travel costs**

26 The model builds upon a common assumption stemming from Brownian mechanics,  
 27 namely that particles, and by extension organisms, vary their turning and speed be-  
 28 haviors independently [2]. Social models generally assume that individuals traveling in  
 29 a group will turn to maintain a common direction with their neighbors, while adopting  
 30 either a fixed or stochastic speed. Here we include a travel cost that forces individuals  
 31 to dynamically adjust their speeds to reflect both energetic and ecological costs. The  
 32 energetic, or metabolic, cost of travel is traditionally expressed as work and increases  
 33 rapidly with incremental changes in speed across a wide range of taxa [3]. In addition,  
 34 animals traveling in groups are more likely to be attacked when they fall behind and  
 35 become separated from their neighbors – a risk that increases quickly with even small  
 36 differences in distance [5]. These metabolic and ecological constraints can be combined  
 37 into a generalized form by assuming a parabolic relationship between individual cost and  
 38 travel speed:

$$c(v) = \phi \left( \frac{v - v^*}{\max\{v\}} \right)^2 \quad (\text{s5})$$

39 Travel cost changes when an individual’s intended speed,  $v$ , deviates from their optimum,  
 40  $v^*$ . While any one individual’s optimal travel speed may be unknown, it is reasonable to  
 41 assume that this expected value is likely expressed by their average speed,  $v^* = \bar{v}$ . We also  
 42 assume that individuals assess such changes relative to their own experienced limitations,  
 43 given by  $\max\{v\}$ . As an individual’s intended speed at time  $t$  is given by its socially  
 44 influenced velocity,  $\mathbf{v}_i^s$ ,  $v$  is defined as  $v = |\mathbf{v}_i^s|$  from Eq. 4 of the main text<sup>§</sup>. Parameter  
 45  $\phi$  is retained as the physical drag constant imposed by the surrounding media. Given  
 46 the cost of travel (Figure S1a), it is likely that organisms will track how these costs vary  
 47 in time and alter their behavior accordingly. We therefore assume that individuals will  
 48 modify any socially motivated changes in speed in proportion to their relative changes in  
 49 travel costs,  $\gamma$ :

$$\gamma = \frac{\delta c}{\delta v} = 2\phi \left( \frac{v - v^*}{\max\{v\}^2} \right) \quad (\text{s6})$$

50 The result is that  $\gamma$  changes linearly with speed as  $v$  deviates from  $v^*$ , which in turn  
 51 causes individuals to either accelerate when  $v < v^*$  or decelerate when  $v > v^*$  (thereby

---

<sup>§</sup>Eq. 4 in the main text relates how individuals intend to respond to any socially motivated movements:  
 $\mathbf{v}_i(t + \Delta t) = v_i^s [1 - \gamma(v_i^s)] \hat{\mathbf{v}}_i^s(t)$

52 imposing either a positive or negative feedback; Figure S1b, c).

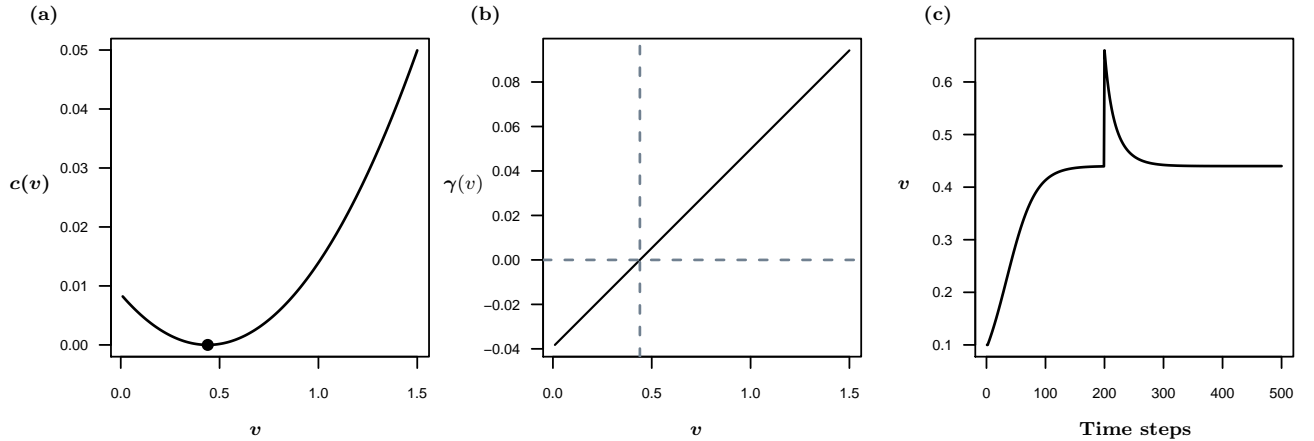

**Figure S1: Generalized travel cost function.** While travel cost (Equation (s5)) is symmetrical about  $v^*$ , an organism’s optimal travel speed is closer to stationary than it is to its maximum potential, which results in more pronounced costs for exceeding  $v^*$  (a). Fig. (b) shows how changes in travel costs are expected to vary linearly as a function of individual speed. Dashed lines represent the transition point as individuals shift between accelerating or decelerating, depending on their departure from  $v^*$ . Fig. (c) shows a numerical simulation in which a single individual’s speed varies over time. The individual is initialized at sub-optimal travel speed, accelerates to its expected speed, then recovers from an imposed startle behavior. Parameters include:  $v^* = 0.44$ ,  $\max\{v\} = 1.5$  and  $\phi = 0.1$ . Distances are scaled to body length,  $2r$ , and time represents simulation steps. Additional parameters are found in Table S1

## 53 S2 Game

### 54 S2.1 Errors, edges, & ecologically relevant effects

55 In a limited number of cases the program failed to record a mouse-click during a trial,  
 56 suggesting that the player did not attack their target. There were 13 such trials distributed  
 57 across 11 players, with only two of these individuals repeating the behavior twice (out of  
 58 144 trials/player). Taken together these trials represented a very small subset of the data  
 59 (13/4320 trials) and any spurious estimates of capture latency or accuracy were readily  
 60 corrected. We visually reviewed the recorded movements of both the virtual prey and of  
 61 the player’s mouse in each of these cases. Only one trial appeared to stem from either  
 62 player or program error, during which the player was clearly following the target, but  
 63 stopped before the simulation ended (Figure S2a). This particular trial was excluded  
 64 from our analyses. Player capture latency ( $P_L$ ) and accuracy ( $P_A$ ) in the remaining 12  
 65 trials were spurious due to edge effects and so were corrected and retained. In these  
 66 scenarios a player would clearly follow a target, but fail to catch them before the target  
 67 moved off-screen (e.g., Figure S2b). Edge effects also occurred when players moved their  
 68 mouse back to the center of the screen before clicking, which was presumably an effort

69 to initiate the next trial (See Movie1 for an example of the protocol that instilled this  
70 behavior). These ‘click’ cases of edge effects were identified as outliers in the  $P_A$  data. In  
71 both click and non-click cases we recalculated both  $P_L$  and  $P_A$  based on where the mouse  
72 cursor was when the target escaped off-screen (green triangle in Figure S2b).

73 In addition to game-related errors, player tracking behavior also displayed character-  
74 istics indicative of either misidentification, or prey-switching. For example, in Figure S2c  
75 we see a player displaying signs of being confused by following the wrong particle. Play-  
76 ers also occasionally would switch prey when a targeted particle came close to another,  
77 analogous to the so-called pass-along effect when a predator may switch targets during  
78 an attack (Figure S2d).

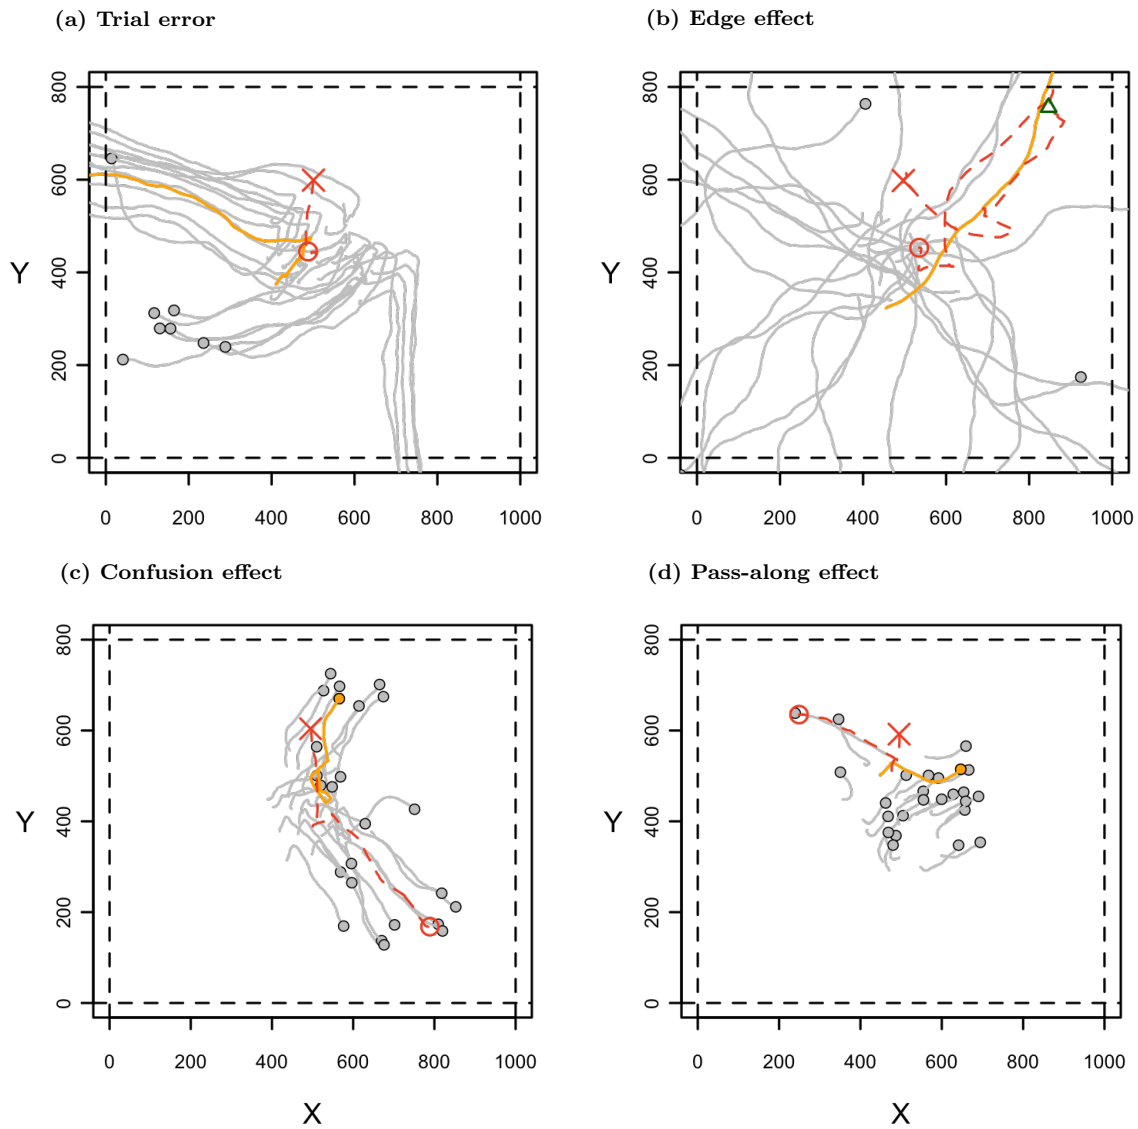

**Figure S2:** Movement patterns of both the simulated prey and player mouse activity in four different trials demonstrating instances of a trial error (a), edge effect (b), player confusion (c), and the pass-along effect (d). Grey circles represent the final positions of each virtual prey, with the target shown in orange. The mouse trajectory is shown in red, beginning with ‘x’ and ending with an open circle. We recorded only one instance of either subject or program error (a), where the player clearly tracks their target, but may simply not have pressed hard enough to trigger a click. In (b) the target manages to reach the safety of the boundary before the player could click on it (edge effect). The green triangle indicates the corrected point of capture which is where the mouse was when the target crossed the boundary. (c) shows an example of the confusion effect where the player tracked the wrong particle. In (d) a near collision between the target and a neighbor causes them to separate from one another, thereby drastically altering the trajectories of these two prey. In this case the player initially drops down towards the target, but then switches to track and capture the neighbor.

## 79 **References**

- 80 1. Lemasson B. H, Anderson J. J , Goodwin R. A (2013) Motion-guided attention  
81 promotes adaptive communications during social navigation. *Proc Roy Soc B* 280:  
82 20122845.
- 83 2. Codling E, Plank M , Benhamou S (2008) Random walk models in biology. *J R Soc*  
84 *Interface* 5: 813–834.
- 85 3. Alexander R (1999) Bioenergetics: one price to run, swim or fly? *Nature* 397: 651–653.
- 86 4. Krause J, Ruxton G (2002) *Living in Groups* eds. Harvey P, May R (Oxford University  
87 Press, London, UK).
- 88 5. Romey W, Walston A , Watt P (2008) Do 3-D predators attack the margins of 2-D  
89 selfish herds? *Behav Ecol* 19: 74–78.
