# Supplementary material for: A Sensory-Driven Trade-Off between Coordinated Motion in Social Prey and a Predator’s Visual Confusion
Source: PubMed Central journal article supplement (PMC4767524; doi:10.1371/journal.pcbi.1004708), 2016-02-25

(a)

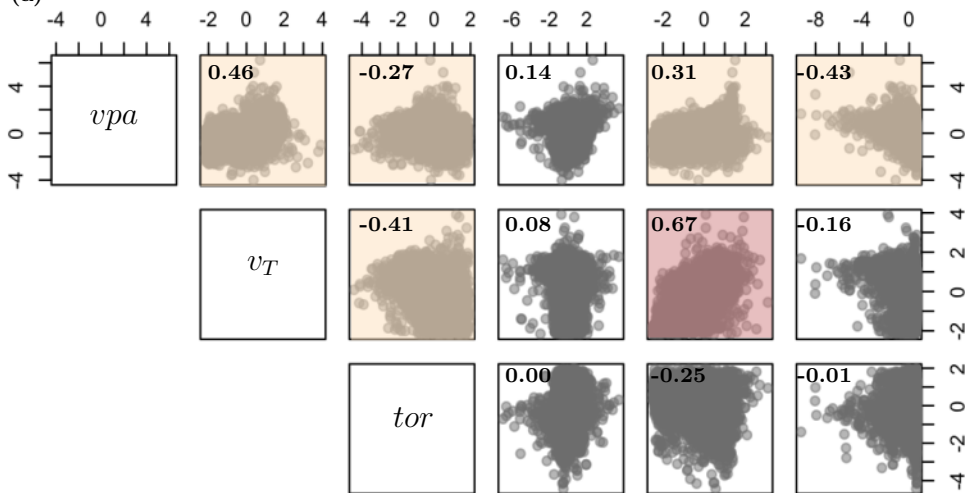

(b)

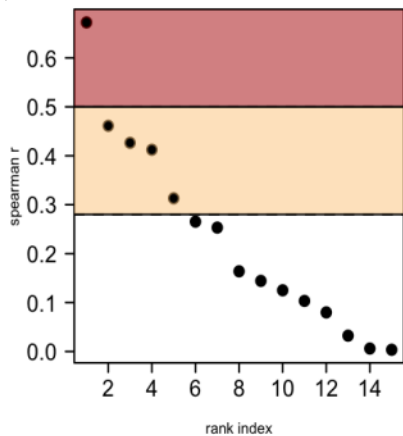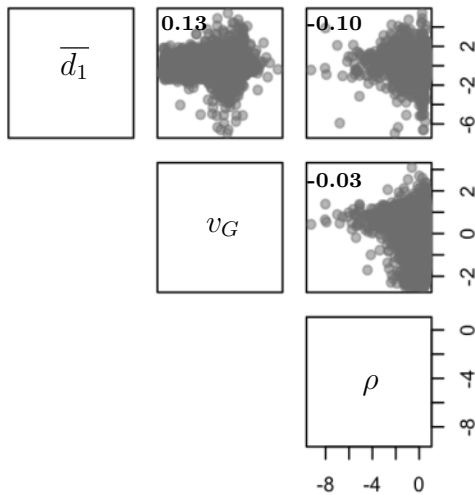

Supplement: pcbi.1004708.s004.pdf [file pcbi.1004708.s004.pdf]
