# Supplementary material for: A Sensory-Driven Trade-Off between Coordinated Motion in Social Prey and a Predator’s Visual Confusion
Source: PubMed Central journal article supplement (PMC4767524; doi:10.1371/journal.pcbi.1004708), 2016-02-25
Supplement: pcbi.1004708.s009.pdf [file pcbi.1004708.s009.pdf]

| Notation       | Description                   | Values              | Units            |
|----------------|-------------------------------|---------------------|------------------|
| $G$            | Group size                    | 25                  | -                |
| $r$            | Particle radius               | 0.5                 | $D$              |
| $\Omega_{min}$ | Minimum detectable image size | 0.009               | radians          |
| $m$            | Motion threshold              | [0.0, 1.5, 2.5, 10] | -                |
| $\alpha$       | Maximum turning arc           | $\pm \pi/2$         | radians          |
| $t$            | Time step                     | 1                   | -                |
| $\eta$         | Noise strength                | 0.1                 | -                |
| $v$            | Min/mean/max travel speed     | [0.1, 0.4, 1.5]     | $D \cdot t^{-1}$ |
| $\phi$         | Drag coefficient              | 0.1                 | -                |
