# Supplementary material for: A Sensory-Driven Trade-Off between Coordinated Motion in Social Prey and a Predator’s Visual Confusion
Source: PubMed Central journal article supplement (PMC4767524; doi:10.1371/journal.pcbi.1004708), 2016-02-25
Supplement: pcbi.1004708.s010.pdf [file pcbi.1004708.s010.pdf]

### Primary factors

---

|                    | Value | SE    | DF  | t-value | p-value |
|--------------------|-------|-------|-----|---------|---------|
| (Intercept)        | 7.162 | 0.026 | 928 | 270.917 | < 0.001 |
| $v_e$              | 0.058 | 0.017 | 928 | 3.488   | 0.001   |
| $\mathcal{L}(m_T)$ | 0.046 | 0.011 | 928 | 4.009   | < 0.001 |

### Kinetic metrics

---

|                     | Value  | SE    | DF  | t-value | p-value | Effect size |
|---------------------|--------|-------|-----|---------|---------|-------------|
| (Intercept)         | 7.277  | 0.017 | 923 | 421.470 | < 0.001 | –           |
| $v_G$               | 0.086  | 0.008 | 923 | 11.050  | < 0.001 | 0.285       |
| $vpa$               | 0.069  | 0.008 | 923 | 8.412   | < 0.001 | 0.226       |
| $tor$               | 0.064  | 0.009 | 923 | 6.973   | < 0.001 | 0.210       |
| $vpa \times z(v_T)$ | -0.030 | 0.010 | 923 | -2.845  | 0.005   | 0.098       |
| $\bar{d}_1$         | 0.027  | 0.008 | 923 | 3.420   | 0.001   | 0.089       |
| $vpa \times tor$    | 0.023  | 0.009 | 923 | 2.574   | 0.010   | 0.075       |
