# Supplementary material for: A Sensory-Driven Trade-Off between Coordinated Motion in Social Prey and a Predator’s Visual Confusion
Source: PubMed Central journal article supplement (PMC4767524; doi:10.1371/journal.pcbi.1004708), 2016-02-25
Supplement: pcbi.1004708.s011.pdf [file pcbi.1004708.s011.pdf]

### Primary factors

---

|                                  | Value  | SE    | DF  | t-value | p-value |
|----------------------------------|--------|-------|-----|---------|---------|
| (Intercept)                      | 0.602  | 0.013 | 926 | 46.556  | < 0.001 |
| $v_e$                            | -0.048 | 0.008 | 926 | -5.888  | < 0.001 |
| $\rho_0$                         | -0.041 | 0.016 | 926 | -2.545  | 0.011   |
| $\mathcal{L}(m_T)$               | -0.041 | 0.016 | 926 | -2.545  | 0.011   |
| $\rho_0 \times \mathcal{L}(m_T)$ | 0.032  | 0.011 | 926 | 2.835   | 0.005   |

### Kinetic metrics

---

|                  | Value  | SE    | DF  | t-value | p-value | Effect size |
|------------------|--------|-------|-----|---------|---------|-------------|
| (Intercept)      | 0.513  | 0.006 | 924 | 79.791  | < 0.001 | –           |
| $v_T$            | -0.052 | 0.005 | 924 | -11.479 | < 0.001 | 0.391       |
| $tor$            | -0.034 | 0.005 | 924 | -7.273  | < 0.001 | 0.256       |
| $z(v_G)$         | -0.012 | 0.006 | 924 | -2.244  | 0.025   | 0.093       |
| $v_T \times tor$ | 0.012  | 0.005 | 924 | 2.636   | 0.009   | 0.090       |
| $vpa$            | -0.012 | 0.004 | 924 | -2.723  | 0.007   | 0.087       |
| $vpa \times tor$ | -0.011 | 0.005 | 924 | -2.346  | 0.019   | 0.083       |
