# Supplementary material for: A Sensory-Driven Trade-Off between Coordinated Motion in Social Prey and a Predator’s Visual Confusion
Source: PubMed Central journal article supplement (PMC4767524; doi:10.1371/journal.pcbi.1004708), 2016-02-25
Supplement: pcbi.1004708.s012.pdf [file pcbi.1004708.s012.pdf]

### Primary factors

---

|                    | Value | SE    | DF   | t-value | p-value |
|--------------------|-------|-------|------|---------|---------|
| (Intercept)        | 7.236 | 0.020 | 1889 | 356.825 | < 0.001 |
| $\mathcal{L}(m_T)$ | 0.036 | 0.007 | 1889 | 4.881   | < 0.001 |

### Kinetic metrics

---

|                     | Value  | SE    | DF   | t-value | p-value | Effect Size |
|---------------------|--------|-------|------|---------|---------|-------------|
| (Intercept)         | 7.279  | 0.015 | 1884 | 486.896 | < 0.001 | –           |
| $v_G$               | 0.073  | 0.005 | 1884 | 13.483  | < 0.001 | 0.271       |
| $tor$               | 0.064  | 0.005 | 1884 | 11.857  | < 0.001 | 0.239       |
| $vpa$               | 0.055  | 0.006 | 1884 | 9.955   | < 0.001 | 0.203       |
| $z(v_T)$            | -0.039 | 0.008 | 1884 | -4.968  | < 0.001 | 0.144       |
| $z(v_T) \times tor$ | 0.021  | 0.007 | 1884 | 2.951   | 0.003   | 0.079       |
| $\overline{d}_1$    | 0.017  | 0.005 | 1884 | 3.474   | 0.001   | 0.064       |
