# Supplementary material for: A Sensory-Driven Trade-Off between Coordinated Motion in Social Prey and a Predator’s Visual Confusion
Source: PubMed Central journal article supplement (PMC4767524; doi:10.1371/journal.pcbi.1004708), 2016-02-25
Supplement: pcbi.1004708.s013.pdf [file pcbi.1004708.s013.pdf]

### Primary factors

---

|                                  | Value  | SE    | DF   | t-value | p-value |
|----------------------------------|--------|-------|------|---------|---------|
| (Intercept)                      | 0.550  | 0.009 | 1887 | 61.402  | < 0.001 |
| $\mathcal{L}(m_T)$               | -0.034 | 0.006 | 1887 | -5.826  | < 0.001 |
| $\rho_0$                         | -0.041 | 0.012 | 1887 | -3.453  | 0.001   |
| $\mathcal{L}(m_T) \times \rho_0$ | 0.018  | 0.008 | 1887 | 2.255   | 0.024   |

---

### Kinetic metrics

---

|                  | Value  | SE    | DF   | t-value | p-value | Effect Size |
|------------------|--------|-------|------|---------|---------|-------------|
| (Intercept)      | 0.504  | 0.005 | 1884 | 104.706 | < 0.001 | –           |
| $v_T$            | -0.048 | 0.003 | 1884 | -13.867 | < 0.001 | 0.369       |
| $tor$            | -0.037 | 0.003 | 1884 | -11.639 | < 0.001 | 0.283       |
| $v_T \times tor$ | 0.013  | 0.003 | 1884 | 3.767   | < 0.001 | 0.096       |
| $vpa \times tor$ | -0.012 | 0.003 | 1884 | -3.741  | < 0.001 | 0.095       |
| $tor$            | -0.012 | 0.003 | 1884 | -3.977  | < 0.001 | 0.093       |
| $z(v_G)$         | -0.008 | 0.004 | 1884 | -1.990  | 0.047   | 0.063       |

---
