# Supplementary material for: A Sensory-Driven Trade-Off between Coordinated Motion in Social Prey and a Predator’s Visual Confusion
Source: PubMed Central journal article supplement (PMC4767524; doi:10.1371/journal.pcbi.1004708), 2016-02-25
Supplement: pcbi.1004708.s014.pdf [file pcbi.1004708.s014.pdf]

### Primary factors

---

|                             | Value  | SE    | DF   | t-value | p-value |
|-----------------------------|--------|-------|------|---------|---------|
| (Intercept)                 | 7.236  | 0.020 | 3806 | 355.321 | < 0.001 |
| $\mathcal{L}(m_T)$          | 0.036  | 0.008 | 3806 | 4.804   | < 0.001 |
| $\mathcal{L}(m_T)$ x veiled | -0.033 | 0.011 | 3806 | -3.125  | 0.002   |

---

### Kinetic metrics

---

|                  | Value  | SE    | DF       | t-value | p-value | Effect Size |
|------------------|--------|-------|----------|---------|---------|-------------|
| (Intercept)      | 7.272  | 0.014 | 3801.000 | 508.583 | < 0.001 | –           |
| $v_G$            | 0.077  | 0.004 | 3801.000 | 20.109  | < 0.001 | 0.256       |
| $tor$            | 0.075  | 0.004 | 3801.000 | 19.873  | < 0.001 | 0.251       |
| $vpa$            | 0.059  | 0.004 | 3801.000 | 14.415  | < 0.001 | 0.195       |
| $z(v_T)$         | -0.038 | 0.006 | 3801.000 | -6.911  | < 0.001 | 0.127       |
| $z(v_T)$ x $tor$ | 0.016  | 0.005 | 3801.000 | 3.147   | 0.002   | 0.054       |
| $\overline{d_1}$ | 0.014  | 0.003 | 3801.000 | 4.136   | < 0.001 | 0.048       |
| $vpa$ x $z(v_T)$ | -0.013 | 0.006 | 3801.000 | -2.234  | 0.026   | 0.043       |
| $\rho$           | 0.008  | 0.004 | 3801.000 | 2.130   | 0.033   | 0.026       |

---
