# Supplementary material for: A Sensory-Driven Trade-Off between Coordinated Motion in Social Prey and a Predator’s Visual Confusion
Source: PubMed Central journal article supplement (PMC4767524; doi:10.1371/journal.pcbi.1004708), 2016-02-25
Supplement: pcbi.1004708.s015.pdf [file pcbi.1004708.s015.pdf]

### Primary factors

---

|                               | Value  | SE    | DF       | t-value | p-value |
|-------------------------------|--------|-------|----------|---------|---------|
| (Intercept)                   | 0.548  | 0.007 | 3804.000 | 76.521  | < 0.001 |
| $\mathcal{L}(m_T)$            | -0.034 | 0.004 | 3804.000 | -7.758  | < 0.001 |
| veiled                        | 0.053  | 0.007 | 3804.000 | 7.204   | < 0.001 |
| $\rho_0$                      | -0.037 | 0.007 | 3804.000 | -5.064  | < 0.001 |
| $\mathcal{L}(m_T)$ x veiled   | -0.016 | 0.005 | 3804.000 | -3.142  | 0.002   |
| $\mathcal{L}(m_T)$ x $\rho_0$ | 0.020  | 0.005 | 3804.000 | 3.850   | < 0.001 |

### Kinetic metrics

---

|               | Value  | SE    | DF   | t-value | p-value | Effect Size |
|---------------|--------|-------|------|---------|---------|-------------|
| (Intercept)   | 0.522  | 0.004 | 3804 | 130.137 | < 0.001 | –           |
| $v_T$         | -0.048 | 0.002 | 3804 | -21.856 | < 0.001 | 0.501       |
| $tor$         | -0.022 | 0.002 | 3804 | -11.001 | < 0.001 | 0.228       |
| $v_T$ x $tor$ | 0.010  | 0.002 | 3804 | 4.740   | < 0.001 | 0.100       |
| $z(v_G)$      | -0.009 | 0.003 | 3804 | -3.533  | < 0.001 | 0.095       |
| $vpa$         | -0.007 | 0.002 | 3804 | -3.697  | < 0.001 | 0.077       |
